# Supplementary material for: What is the Optimal Body Mass Index Range for Older Adults?
Source: PubMed Central journal article supplement — Ann Geriatr Med Res. 2022 Mar 25;26(1):49–57. doi: 10.4235/agmr.22.0012 (PMC8984168; doi:10.4235/agmr.22.0012), 2022-03-25
Supplement: agmr-22-0012-suppl.pdf [file agmr-22-0012-suppl.pdf]

## SUPPLEMENTARY MATERIALS

**Table S1.** Evaluation of the relationship between chronic diseases and BMI

|                   | Group 1 (BMI < 24.9)<br>(n = 163) | Group 2 (BMI 25–29.9)<br>(n = 298) | Group 3 (BMI 30–34.9)<br>(n = 320) | Group 4 (BMI 35–39.9)<br>(n = 182) | Group 5 (BMI > 40)<br>(n = 88) | p-value |
|-------------------|-----------------------------------|------------------------------------|------------------------------------|------------------------------------|--------------------------------|---------|
| Hypertension (%)  | 62                                | 63                                 | 75                                 | 80                                 | 78                             | 0.004   |
| DM (%)            | 21                                | 35                                 | 35                                 | 51                                 | 49                             | 0.006   |
| CAD (%)           | 22                                | 17                                 | 14                                 | 16                                 | 14                             | 0.360   |
| COPD (%)          | 7                                 | 9                                  | 12                                 | 13                                 | 23                             | 0.004   |
| Heart failure (%) | 5                                 | 9                                  | 6                                  | 8                                  | 8                              | 0.643   |

BMI, body mass index; DM, diabetes mellitus; CAD, coronary artery disease; COPD, chronic obstructive pulmonary disease.
